# Supplementary material
Source: PubMed Central journal article supplement (PMC2906851)
Supplement: 1000779107_pnas.201000779SI.pdf [file 1000779107_pnas.201000779SI.pdf]

# Supporting Information

Tassi et al. 10.1073/pnas.1000779107

**Table S1. Clinical characteristics and ongoing treatment of CAPS patients**

| Patient | Sex | <i>CIAS-1</i> mutation | Disease onset | Age, years | Therapy              |
|---------|-----|------------------------|---------------|------------|----------------------|
| C1      | M   | N477K                  | Birth         | 10.75      | Anakinra 1 mg/kg/day |
| C2      | F   | D303N                  | 1 week        | 9.2        | Canakinumab 2 mg/kg  |
| C3      | M   | T348M                  | 6 months      | 23.2       | —                    |
| C4      | M   | I572F                  | 2 weeks       | 12.2       | —                    |
| C5      | F   | —                      | Birth         | 15.7       | —                    |
| MW1     | M   | R260W                  | 2 years       | 13         | —                    |
| MW2     | F   | R260W                  | 6 years       | 43         | —                    |
| MW3     | F   | D303N                  | 3 weeks       | 3.5        | Anakinra 1 mg/kg/day |
| MW4     | F   | E525K                  | 15 months     | 15.6       | —                    |

**Table S2. Clinical characteristics and ongoing treatment of SoJIA patients**

| Patient | Sex | Disease onset, years | Age, years | Steroid treatment        | Other treatment        |
|---------|-----|----------------------|------------|--------------------------|------------------------|
| JIA1    | F   | 9.8                  | 9.8        | Prednisone 1.5 mg/kg/day | —                      |
| JIA2    | M   | 12.3                 | 15.9       | Prednisone 0.2 mg/kg/day | NSAID                  |
| JIA3    | F   | 0.9                  | 4.5        | Prednisone 0.7 mg/kg/day | Thalidomide, abatacept |
| JIA4    | F   | 3.2                  | 11         | —                        | NSAID                  |
| JIA5    | M   | 7.2                  | 9.9        | Prednisone 0.3 mg/kg/day | NSAID                  |

NSAID, nonsteroidal antiinflammatory drug.
